# Supplementary material for: Association of body mass index and inflammatory dietary pattern with breast cancer pathologic and genomic immunophenotype in the nurses’ health study
Source: Springer Nature journal article supplement (doi:10.1186/s13058-022-01573-5), 2022-11-14

# Supplementary Figure 1

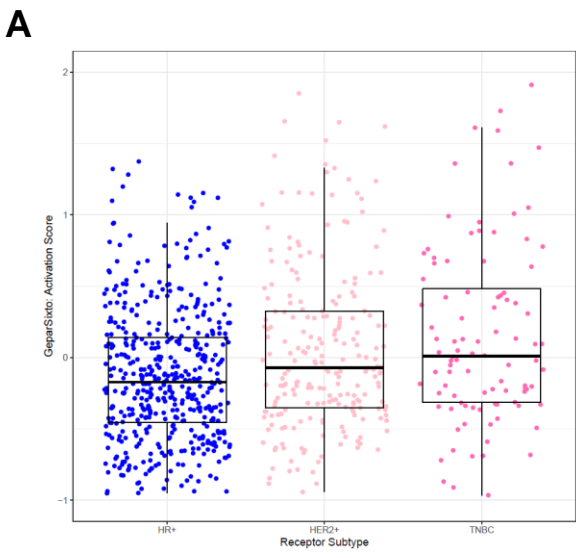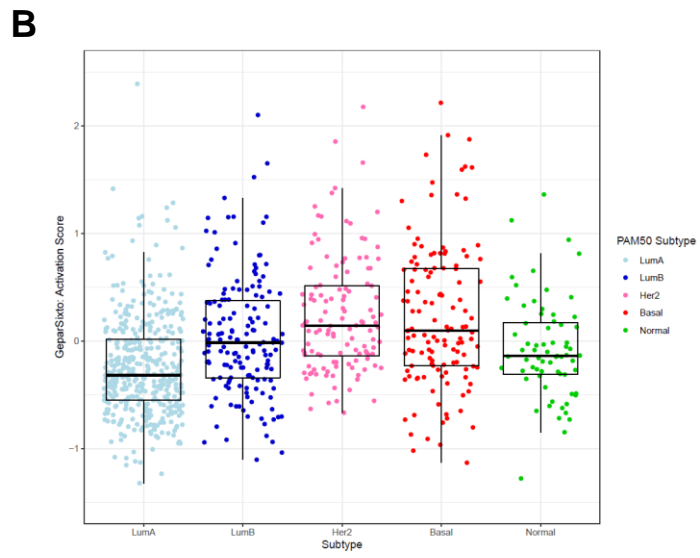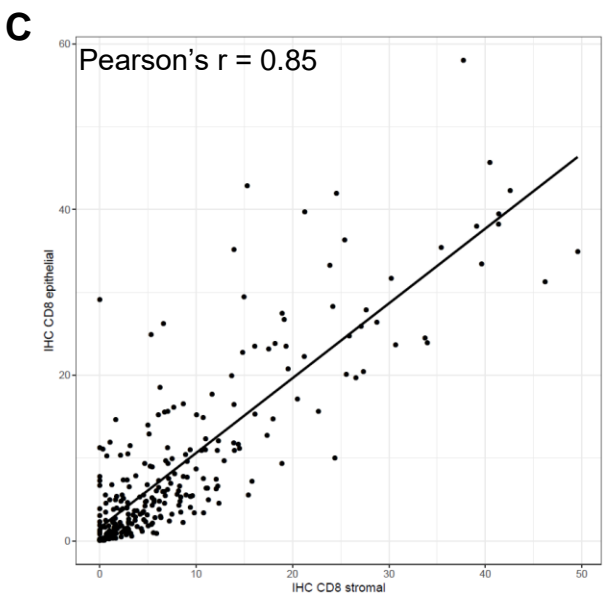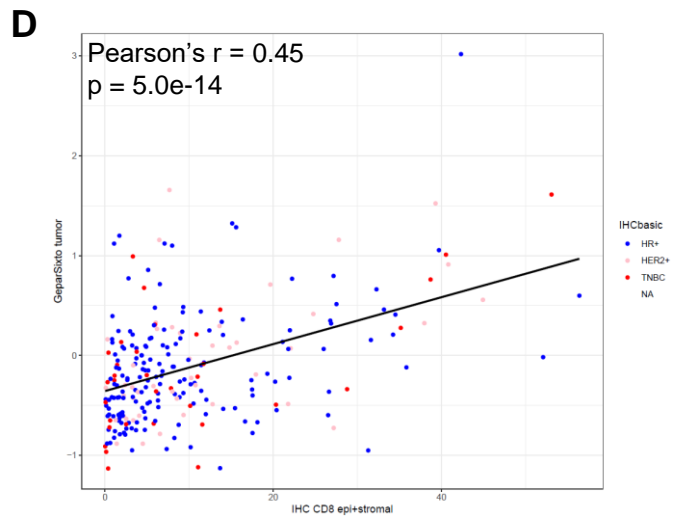

**E**

Correlation: Pearson's r

|                            | GEPARSIXTO | CD8A Single Gene |
|----------------------------|------------|------------------|
| CD8 IHC stromal+epithelial | 0.453      | 0.154            |
| CD8 IHC stromal            | 0.466      | 0.196            |
| CD8 IHC epithelial         | 0.456      | 0.163            |

# Supplementary Figure 2

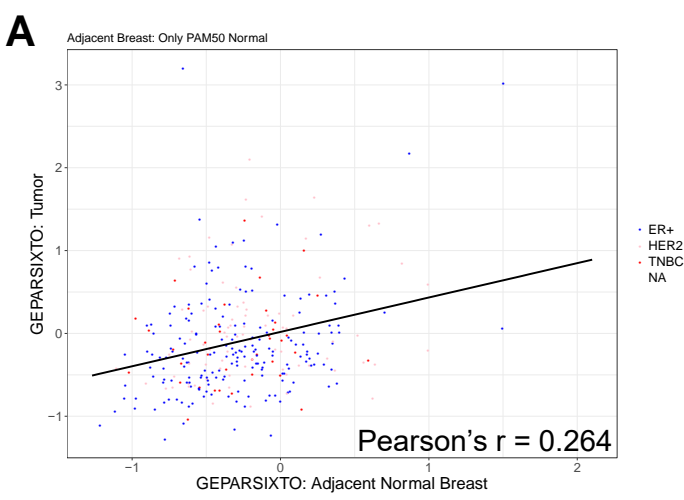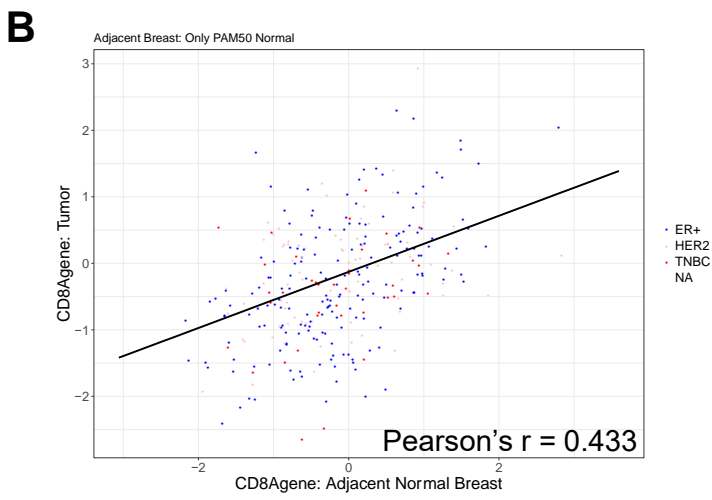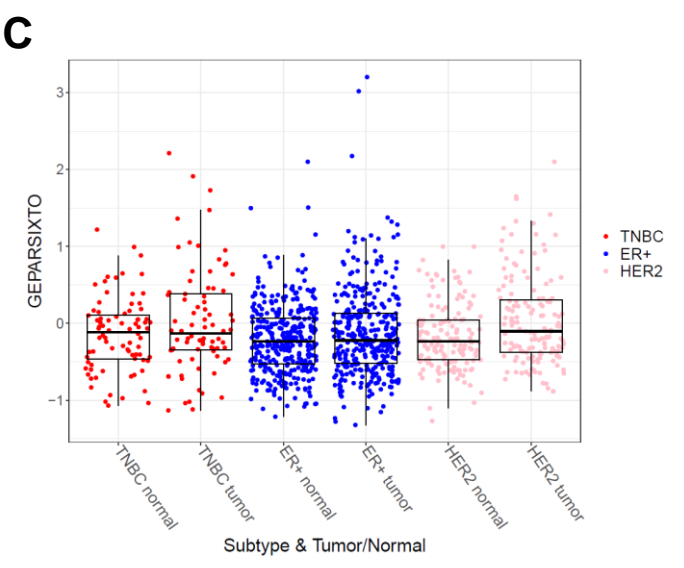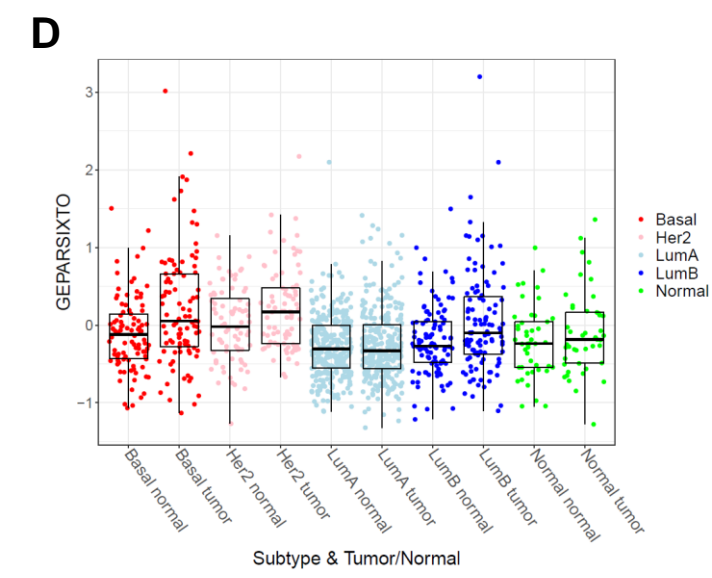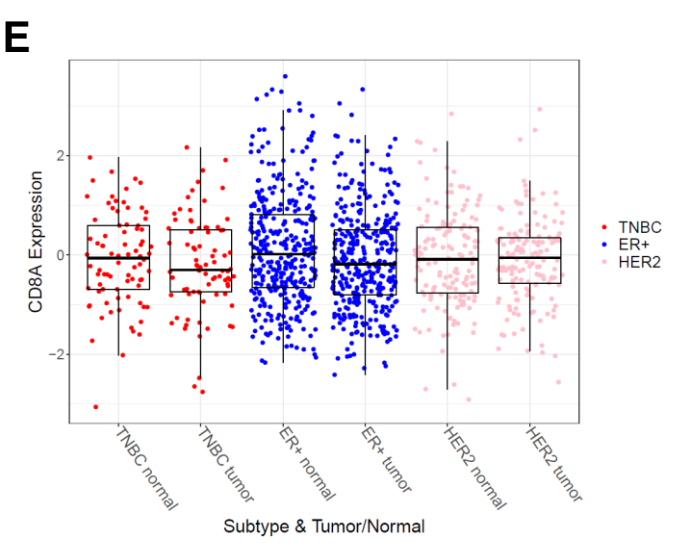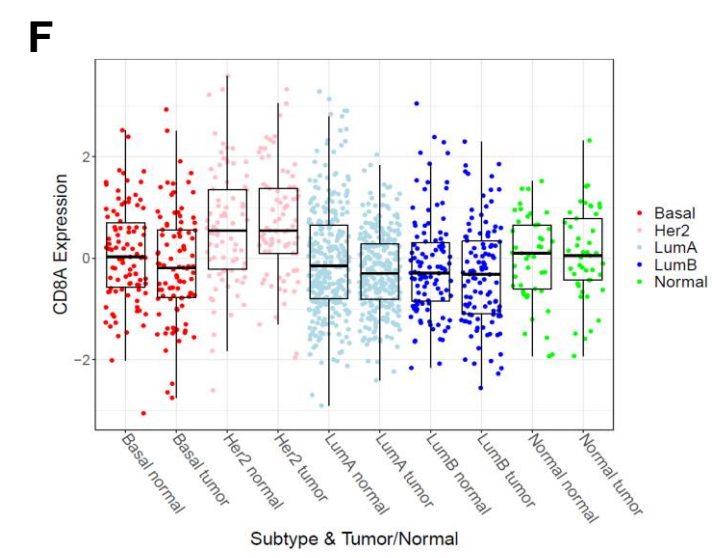

# Supplementary Figure 3

## A. Overall

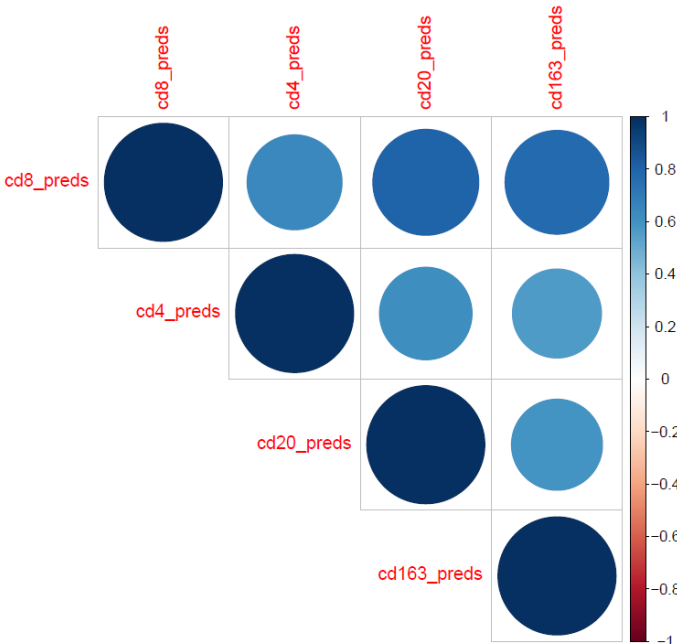

## B. HR+

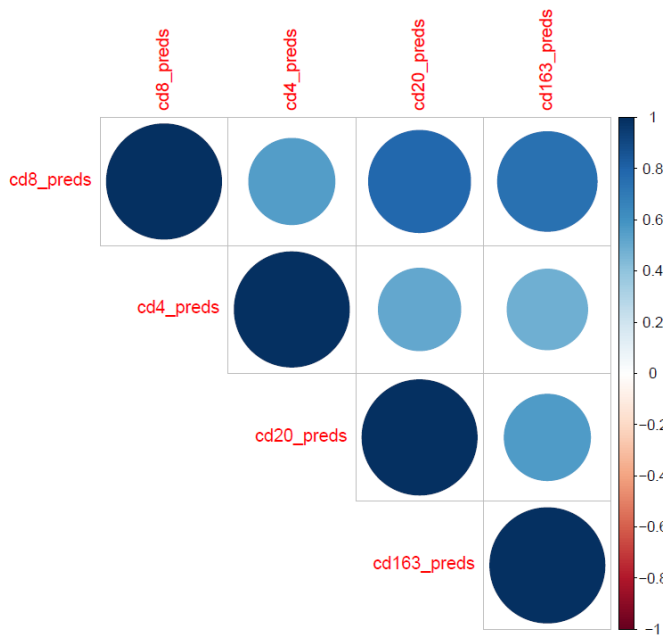

## C. HER2+

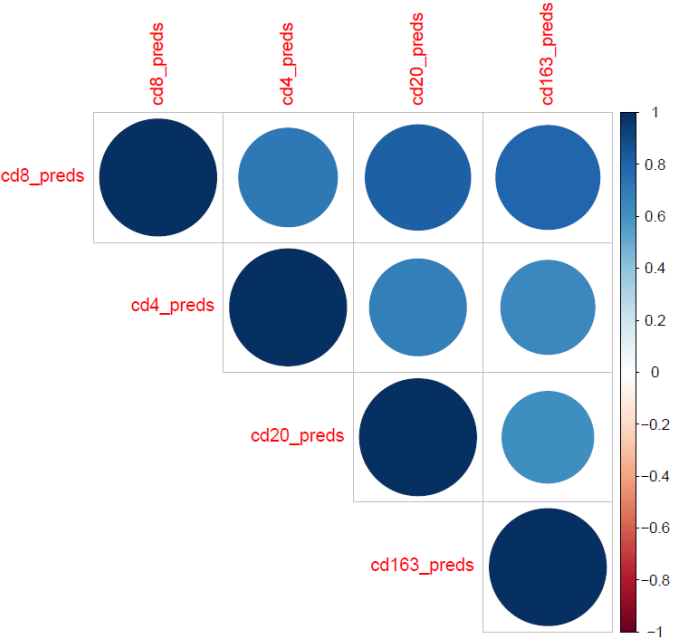

## D. TNBC

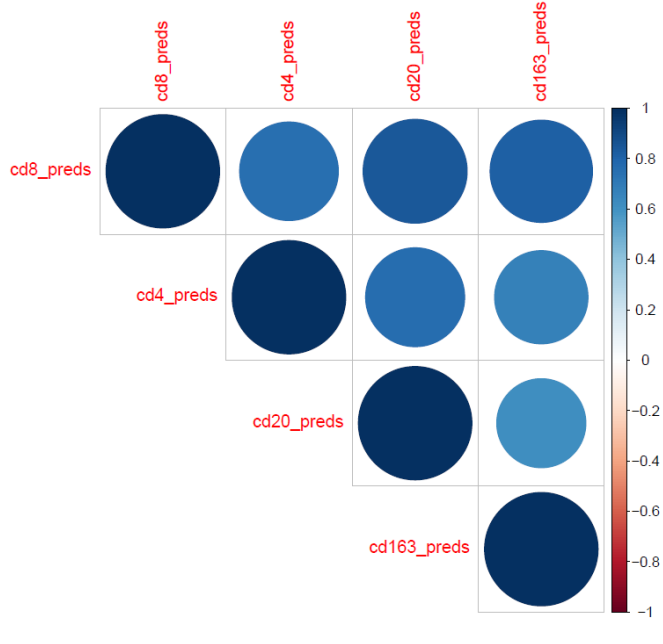

Supplement: MOESM4 [file 23710434]
